# Supplementary material for: The effect of multi-ingredient intra- versus extra-cellular buffering supplementation combined with branched-chain amino acids and creatine on exercise-induced ammonia blood concentration and aerobic capacity in taekwondo athletes
Source: PubMed Central journal article supplement (PMC8204562; doi:10.1186/s12970-021-00451-3), 2021-06-14
Supplement: 12970_2021_451_MOESM1_ESM.pdf [file 12970_2021_451_MOESM1_ESM.pdf]

## Supporting files

[Table S1] The number, duration, and average intensity (percentage of maximum heart rate) of training sessions and tournaments in tested taekwondo athletes before, during the supplementation and washout periods.

|                                                      | <b>Initial period*</b>      |       | <b>1<sup>st</sup> Treatment</b> |       |           | <b>Washout</b>            |       |           | <b>2<sup>nd</sup> Treatment</b> |       |           |
|------------------------------------------------------|-----------------------------|-------|---------------------------------|-------|-----------|---------------------------|-------|-----------|---------------------------------|-------|-----------|
|                                                      | 8 weeks                     |       | 8 weeks                         |       |           | 8 weeks                   |       |           | 8 weeks                         |       |           |
|                                                      | 5 Dec 2015 –<br>29 Nov 2015 |       | 30 Nov 2015 – 15 Jan 2016       |       |           | 16 Jan 2016 – 17 Apr 2016 |       |           | 18 Apr 2016 – 12 Jun 2016       |       |           |
|                                                      | No.                         | Hours | No.                             | Hours | Intensity | No.                       | Hours | Intensity | No.                             | Hours | Intensity |
| Training sessions                                    |                             |       |                                 |       |           |                           |       |           |                                 |       |           |
| - total                                              | 44                          | 88    | 49                              | 98    | –         | 56                        | 112   | –         | 41                              | 82    | –         |
| - taekwondo-specific circuits                        | 11                          | 22    | 16                              | 32    | 90±2      | 19                        | 38    | 91±2      | 8                               | 16    | 90±2      |
| - speed & power                                      | –                           | –     | –                               | –     | –         | 6                         | 12    | –         | 8                               | 16    | –         |
| - technique & tactics                                | 9                           | 18    | 17                              | 34    | 83±3      | 16                        | 32    | 85±3      | 17                              | 34    | 88±2      |
| - strength & conditioning                            | 12                          | 24    | –                               | –     | –         | –                         | –     | –         | –                               | –     | –         |
| - individual (strength or<br>technique or endurance) | 12                          | 24    | 16                              | 24    | –         | 15                        | 30    | –         | 8                               | 12    | –         |
| Tournaments                                          | 4                           | –     | 4                               | –     | 93±1      | 5                         | –     | 94±1      | 6                               | –     | 93±1      |

\* workout intensity was not recorded in this period
